# Supplementary material for: The use of traditional medicine in maternity care among African women in Africa and the diaspora: a systematic review
Source: Springer Nature journal article supplement (doi:10.1186/s12906-017-1886-x), 2017-08-02
Supplement: MOESM1 [file 13345406]

## Appendix A: Search terms and number of records found from each databases

| Database | Search string                                                                                                                                                                                                                                                                                                                                                                                                                                                                                                                                                                                                                                                                                                                                                                                                                                                                                                                                                                                                                                                                                                                                                                                                                                                                                                                                                                                                                                                                                                                                         | Number of records |
|----------|-------------------------------------------------------------------------------------------------------------------------------------------------------------------------------------------------------------------------------------------------------------------------------------------------------------------------------------------------------------------------------------------------------------------------------------------------------------------------------------------------------------------------------------------------------------------------------------------------------------------------------------------------------------------------------------------------------------------------------------------------------------------------------------------------------------------------------------------------------------------------------------------------------------------------------------------------------------------------------------------------------------------------------------------------------------------------------------------------------------------------------------------------------------------------------------------------------------------------------------------------------------------------------------------------------------------------------------------------------------------------------------------------------------------------------------------------------------------------------------------------------------------------------------------------------|-------------------|
| CNAHL    | AB ( Women OR females OR mothers ) AND TX ( Africa* OR "African migrant" OR "African-born" OR " African immigrant" OR Algeria OR Angola OR Benin OR Botswana OR "Burkina Faso" OR Burundi OR Cameroon OR "Cape Verde" OR "Central African Republic" OR Chad OR Comoros OR "Ivory Coast" OR Congo OR Djibouti OR Egypt OR "Equatorial Guinea" OR Eritrea OR Ethiopia OR Gabon OR Gambia OR Ghana OR Guinea OR "Guinea Bissau" OR Kenya OR Lesotho OR Liberia OR Libya OR Madagascar OR Malawi OR Mali OR Mauritania OR Mauritius OR Morocco OR Mozambique OR Namibia OR Niger OR Nigeria OR Rwanda OR "Sao Tome" OR Senegal OR Seychelles OR "Sierra Leone" OR Somalia OR "South Africa" OR Sudan OR "South Sudan" OR Swaziland OR Tanzania OR Togo OR Tunisia OR Uganda OR Zambia OR Zimbabwe ) AND AB ( "traditional medicine" OR "traditional African medicine" OR "complementary medicine" OR "traditional therapy" OR "complementary therapy" OR "alternative medicine" OR "alternative therapy" OR "natural medicine" OR "herbal medicine" OR herb OR "herbal medicine" OR "medicinal plant" OR "folk medicine" OR "holistic medicine" OR "traditional health practice" ) AND AB ( Matern* OR "maternal health" OR pregnan* OR "pregnancy conditions" OR "maternal care" OR "maternal services" OR mother* OR "child bearing" OR "child birth" OR gestation OR "antenatal care" OR lactat* or "milk secretion" OR "after birth" OR "post birth" OR "post natal care" or labor OR labour OR abortion OR miscarriage OR fertility OR infertility ) | 61                |
| Medline  | AB ( Women OR females OR mothers ) AND TX ( Africa* OR "African migrant" OR "African-born" OR " African immigrant" OR Algeria OR Angola OR Benin OR Botswana OR "Burkina Faso" OR Burundi OR Cameroon OR "Cape Verde" OR "Central African Republic" OR Chad OR Comoros OR "Ivory Coast" OR Congo OR Djibouti OR Egypt OR "Equatorial Guinea" OR Eritrea OR Ethiopia OR Gabon OR Gambia OR Ghana OR Guinea OR "Guinea Bissau" OR Kenya OR Lesotho OR Liberia OR Libya OR Madagascar OR Malawi OR Mali OR Mauritania OR Mauritius OR Morocco OR Mozambique OR Namibia OR Niger OR Nigeria OR Rwanda OR "Sao Tome" OR Senegal OR Seychelles OR "Sierra Leone" OR Somalia OR "South Africa" OR Sudan OR "South Sudan" OR Swaziland OR Tanzania OR Togo OR Tunisia OR Uganda OR Zambia OR Zimbabwe ) AND AB ( "traditional medicine" OR "traditional African medicine" OR "complementary medicine" OR "traditional therapy" OR "complementary therapy" OR "alternative medicine" OR "alternative therapy" OR "natural medicine" OR "herbal medicine" OR herb OR "herbal medicine" OR "medicinal plant" OR "folk medicine" OR "holistic medicine" OR "traditional health practice" ) AND AB ( Matern* OR "maternal health" OR pregnan* OR "pregnancy conditions" OR "maternal care" OR "maternal services" OR mother* OR "child bearing" OR "child birth" OR gestation OR "antenatal care" OR lactat* or "milk secretion" OR "after birth" OR "post birth" OR "post natal care" or labor OR labour OR abortion OR miscarriage OR fertility OR infertility ) | 94                |
| ProQuest | ab(Women OR females OR mothers) AND ft(Africa* OR "African migrant" OR "African-born" OR " African immigrant" OR Algeria OR Angola OR Benin OR Botswana OR "Burkina Faso" OR Burundi OR Cameroon OR "Cape Verde" OR "Central African Republic" OR Chad OR Comoros OR "Ivory Coast" OR Congo OR Djibouti OR Egypt OR "Equatorial Guinea" OR Eritrea OR Ethiopia OR Gabon OR Gambia OR Ghana OR Guinea OR "Guinea Bissau" OR Kenya OR Lesotho OR Liberia OR Libya OR Madagascar OR Malawi OR Mali OR Mauritania OR Mauritius OR Morocco OR Mozambique OR Namibia OR Niger OR Nigeria OR Rwanda OR "Sao Tome" OR Senegal OR Seychelles OR "Sierra Leone" OR Somalia OR "South Africa" OR Sudan OR "South Sudan" OR Swaziland OR Tanzania OR Togo OR Tunisia OR Uganda OR Zambia OR Zimbabwe) AND ab("traditional medicine" OR "traditional African medicine" OR "complementary medicine" OR "traditional therapy" OR "complementary therapy" OR "alternative medicine" OR "alternative therapy" OR "natural medicine" OR "herbal medicine" OR herb OR "herbal medicine" OR "medicinal plant" OR "folk medicine" OR "holistic medicine" OR "traditional health practice") AND ab(Matern* OR "maternal health" OR pregnan* OR "pregnancy conditions" OR "maternal care" OR "maternal services" OR mother* OR "child bearing" OR "child birth" OR gestation OR "antenatal care" OR lactat* OR "milk secretion" OR "after birth" OR "post birth" OR "post natal care" OR labor OR labour OR abortion OR miscarriage OR fertility OR infertility)             | 883               |
| PsycINFO | AB ( Women OR females OR mothers ) AND TX ( Africa* OR "African migrant" OR "African-born" OR " African                                                                                                                                                                                                                                                                                                                                                                                                                                                                                                                                                                                                                                                                                                                                                                                                                                                                                                                                                                                                                                                                                                                                                                                                                                                                                                                                                                                                                                               | 17                |

|        |                                                                                                                                                                                                                                                                                                                                                                                                                                                                                                                                                                                                                                                                                                                                                                                                                                                                                                                                                                                                                                                                                                                                                                                                                                                                                                                                                                                                                                                                                                                                                                                                                                                                                                                                                                                                                                                                                                                                                                                                                                                                                                                                                                                                                                                                                                                                                                                                                                                                                                                                                                                                                                                                                                                                                                                                                                                            |     |
|--------|------------------------------------------------------------------------------------------------------------------------------------------------------------------------------------------------------------------------------------------------------------------------------------------------------------------------------------------------------------------------------------------------------------------------------------------------------------------------------------------------------------------------------------------------------------------------------------------------------------------------------------------------------------------------------------------------------------------------------------------------------------------------------------------------------------------------------------------------------------------------------------------------------------------------------------------------------------------------------------------------------------------------------------------------------------------------------------------------------------------------------------------------------------------------------------------------------------------------------------------------------------------------------------------------------------------------------------------------------------------------------------------------------------------------------------------------------------------------------------------------------------------------------------------------------------------------------------------------------------------------------------------------------------------------------------------------------------------------------------------------------------------------------------------------------------------------------------------------------------------------------------------------------------------------------------------------------------------------------------------------------------------------------------------------------------------------------------------------------------------------------------------------------------------------------------------------------------------------------------------------------------------------------------------------------------------------------------------------------------------------------------------------------------------------------------------------------------------------------------------------------------------------------------------------------------------------------------------------------------------------------------------------------------------------------------------------------------------------------------------------------------------------------------------------------------------------------------------------------------|-----|
|        | immigrant" OR Algeria OR Angola OR Benin OR Botswana OR "Burkina Faso" OR Burundi OR Cameroon OR "Cape Verde" OR "Central African Republic" OR Chad OR Comoros OR "Ivory Coast" OR Congo OR Djibouti OR Egypt OR "Equatorial Guinea" OR Eritrea OR Ethiopia OR Gabon OR Gambia OR Ghana OR Guinea OR "Guinea Bissau" OR Kenya OR Lesotho OR Liberia OR Libya OR Madagascar OR Malawi OR Mali OR Mauritania OR Mauritius OR Morocco OR Mozambique OR Namibia OR Niger OR Nigeria OR Rwanda OR "Sao Tome" OR Senegal OR Seychelles OR "Sierra Leone" OR Somalia OR "South Africa" OR Sudan OR "South Sudan" OR Swaziland OR Tanzania OR Togo OR Tunisia OR Uganda OR Zambia OR Zimbabwe ) AND AB ( "traditional medicine" OR "traditional African medicine" OR "complementary medicine" OR "traditional therapy" OR "complementary therapy" OR "alternative medicine" OR "alternative therapy" OR "natural medicine" OR "herbal medicine" OR herb OR "herbal medicine" OR "medicinal plant" OR "folk medicine" OR "holistic medicine" OR "traditional health practice" ) AND AB ( Matern* OR "maternal health" OR pregnan* OR "pregnancy conditions" OR "maternal care" OR "maternal services" OR mother* OR "child bearing" OR "child birth" OR gestation OR "antenatal care" OR lactat* or "milk secretion" OR "after birth" OR "post birth" OR "post natal care" or labor OR labour OR abortion OR miscarriage OR fertility OR infertility )                                                                                                                                                                                                                                                                                                                                                                                                                                                                                                                                                                                                                                                                                                                                                                                                                                                                                                                                                                                                                                                                                                                                                                                                                                                                                                                                                                                                              |     |
| PubMed | ((((Women[Title/Abstract] OR females[Title/Abstract] OR mothers[Title/Abstract])) AND (Africa*[Text Word] OR "African migrant"[Text Word] OR "African-born"[Text Word] OR " African immigrant"[Text Word] OR Algeria[Text Word] OR Angola[Text Word] OR Benin[Text Word] OR Botswana[Text Word] OR "Burkina Faso"[Text Word] OR Burundi[Text Word] OR Cameroon[Text Word] OR "Cape Verde"[Text Word] OR "Central African Republic"[Text Word] OR Chad[Text Word] OR Comoros[Text Word] OR "Ivory Coast"[Text Word] OR Congo[Text Word] OR Djibouti[Text Word] OR Egypt[Text Word] OR "Equatorial Guinea"[Text Word] OR Eritrea[Text Word] OR Ethiopia[Text Word] OR Gabon[Text Word] OR Gambia[Text Word] OR Ghana[Text Word] OR Guinea[Text Word] OR "Guinea Bissau"[Text Word] OR Kenya[Text Word] OR Lesotho[Text Word] OR Liberia[Text Word] OR Libya[Text Word] OR Madagascar[Text Word] OR Malawi[Text Word] OR Mali[Text Word] OR Mauritania[Text Word] OR Mauritius[Text Word] OR Morocco[Text Word] OR Mozambique[Text Word] OR Namibia[Text Word] OR Niger[Text Word] OR Nigeria[Text Word] OR Rwanda[Text Word] OR "Sao Tome"[Text Word] OR Senegal[Text Word] OR Seychelles[Text Word] OR "Sierra Leone"[Text Word] OR Somalia[Text Word] OR "South Africa"[Text Word] OR Sudan[Text Word] OR "South Sudan"[Text Word] OR Swaziland[Text Word] OR Tanzania[Text Word] OR Togo[Text Word] OR Tunisia[Text Word] OR Uganda[Text Word] OR Zambia[Text Word] OR Zimbabwe[Text Word])) AND ("traditional medicine"[Title/Abstract] OR "traditional African medicine"[Title/Abstract] OR "complementary medicine"[Title/Abstract] OR "traditional therapy"[Title/Abstract] OR "complementary therapy"[Title/Abstract] OR "alternative medicine"[Title/Abstract] OR "alternative therapy"[Title/Abstract] OR "natural medicine"[Title/Abstract] OR "herbal medicine"[Title/Abstract] OR herb[Title/Abstract] OR "herbal medicine"[Title/Abstract] OR "medicinal plant"[Title/Abstract] OR "folk medicine"[Title/Abstract] OR "holistic medicine"[Title/Abstract] OR "traditional health practice"[Title/Abstract])) AND (Matern*[Title/Abstract] OR "maternal health"[Title/Abstract] OR pregnan*[Title/Abstract] OR "pregnancy conditions"[Title/Abstract] OR "maternal care"[Title/Abstract] OR "maternal services"[Title/Abstract] OR mother*[Title/Abstract] OR "child bearing"[Title/Abstract] OR "child birth"[Title/Abstract] OR gestation[Title/Abstract] OR "antenatal care"[Title/Abstract] OR lactat*[Title/Abstract] OR "milk secretion"[Title/Abstract] OR "after birth"[Title/Abstract] OR "post birth"[Title/Abstract] OR "post natal care"[Title/Abstract] OR labor[Title/Abstract] OR labour[Title/Abstract] OR abortion[Title/Abstract] OR miscarriage[Title/Abstract] OR fertility[Title/Abstract] OR infertility[Title/Abstract]) | 112 |
| SCOPUS | ABS(Women OR females OR mothers) AND ABS(Africa* OR "African migrant" OR "African-born" OR " African immigrant" OR Algeria OR Angola OR Benin OR Botswana OR "Burkina Faso" OR Burundi OR Cameroon OR "Cape Verde" OR "Central African Republic" OR Chad OR Comoros OR "Ivory Coast" OR Congo OR Djibouti OR Egypt OR "Equatorial Guinea" OR Eritrea OR Ethiopia OR Gabon OR Gambia OR Ghana OR Guinea OR "Guinea Bissau" OR Kenya OR Lesotho OR Liberia OR Libya OR Madagascar OR Malawi OR Mali OR Mauritania OR Mauritius OR Morocco OR Mozambique OR Namibia OR Niger OR Nigeria OR Rwanda OR "Sao Tome" OR Senegal OR Seychelles OR "Sierra Leone" OR Somalia OR "South Africa" OR Sudan OR "South Sudan" OR Swaziland OR Tanzania OR Togo OR Tunisia OR Uganda OR Zambia OR Zimbabwe) AND ABS("Traditional medicine" OR "traditional African medicine" OR "complementary medicine" OR "traditional therapy" OR "complementary therapy" OR "alternative medicine" OR "alternative therapy" OR "natural medicine" OR                                                                                                                                                                                                                                                                                                                                                                                                                                                                                                                                                                                                                                                                                                                                                                                                                                                                                                                                                                                                                                                                                                                                                                                                                                                                                                                                                                                                                                                                                                                                                                                                                                                                                                                                                                                                                                   | 248 |
